# Supplementary material for: A simple and general strategy for postsurgical personalized cancer vaccine therapy based on an injectable dynamic covalent hydrogel
Source: Royal Society of Chemistry journal article supplement (doi:10.1039/d1bm01000j), 2021-01-01
Supplement: d1bm01000j1.pdf [file d1bm01000j1.pdf]

## Supporting Information for

### **A Simple and General Strategy for Postsurgical Personalized Cancer**

### **Vaccine Therapy Based on an Injectable Dynamic Covalent Hydrogel**

**Zhentaoyu<sup>a, b</sup>, Yudi Xu<sup>b, g</sup>, Haochen Yao<sup>b, c</sup>, Xinghui Si<sup>b, d</sup>, Guofeng Ji<sup>a, b</sup>, Si Dong<sup>b, e</sup>,  
Jiayu Zhao<sup>b, f</sup>, Zhaohui Tang<sup>b, d, f</sup>, Xuedong Fang<sup>\*a</sup>, Wantong Song<sup>\*b, d</sup>, and Xuesi  
Chen<sup>b, d, f</sup>**

<sup>a</sup> Department of Gastrointestinal and Colorectal Surgery, China-Japan Union Hospital of Jilin University, 126 Xiantai Road, Changchun 130033, China.

<sup>b</sup> Key Laboratory of Polymer Ecomaterials, Changchun Institute of Applied Chemistry, Chinese Academy of Sciences, 5625 Renmin Road, Changchun 130022, China.

<sup>c</sup> Department of Pathogenobiology, The Key Laboratory of Zoonosis, Chinese Ministry of Education, College of Basic Medical Science, Jilin University, Changchun 130021, China.

<sup>d</sup> Jilin Biomedical Polymers Engineering Laboratory, Changchun, 130022, China.

<sup>e</sup> College of Chemistry, Northeast Normal University, Changchun 130024, China.

<sup>f</sup> University of Science and Technology of China, 96 Jinzhai Road, Hefei 230026, China.

<sup>g</sup> University of Chinese Academy of Sciences, 19 Yuquan Road, Beijing, 100049, China.

\*Corresponding author: [wtsong@ciac.ac.cn](mailto:wtsong@ciac.ac.cn) and [fangxd@jlu.edu.cn](mailto:fangxd@jlu.edu.cn)

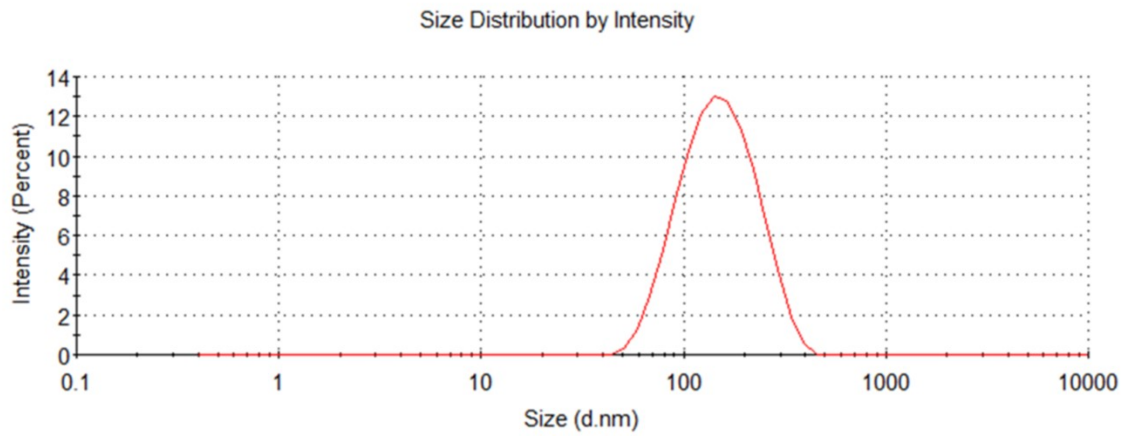

**Fig.S1.** DLS results of CpG/PEI. PDI = 0.175, zeta potential = +34.2 mV.

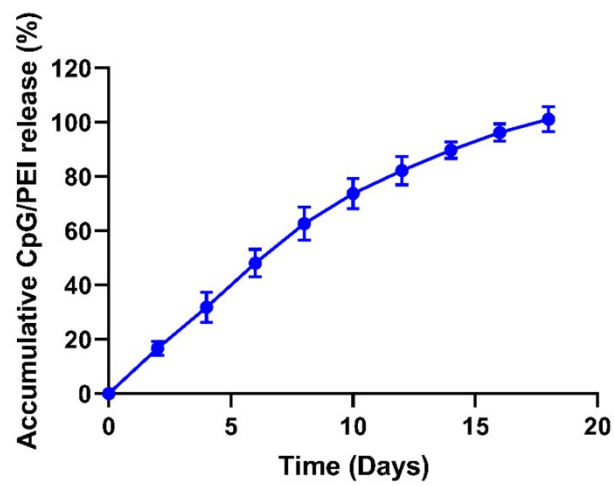

**Fig.S2.** Accumulative release of CpG/PEI from DCHVax in PBS, pH 7.4 (n = 3).

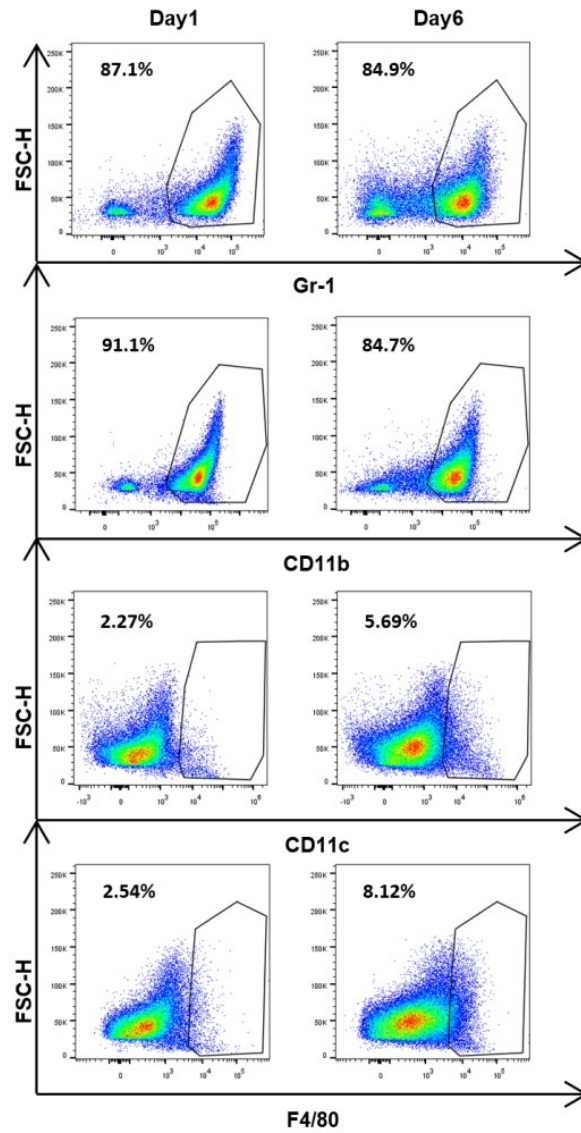

**Fig.S3.** Gating strategy and representative images of the flow cytometry analysis of immune cells infiltration in the subcutaneously injected DCHVax.

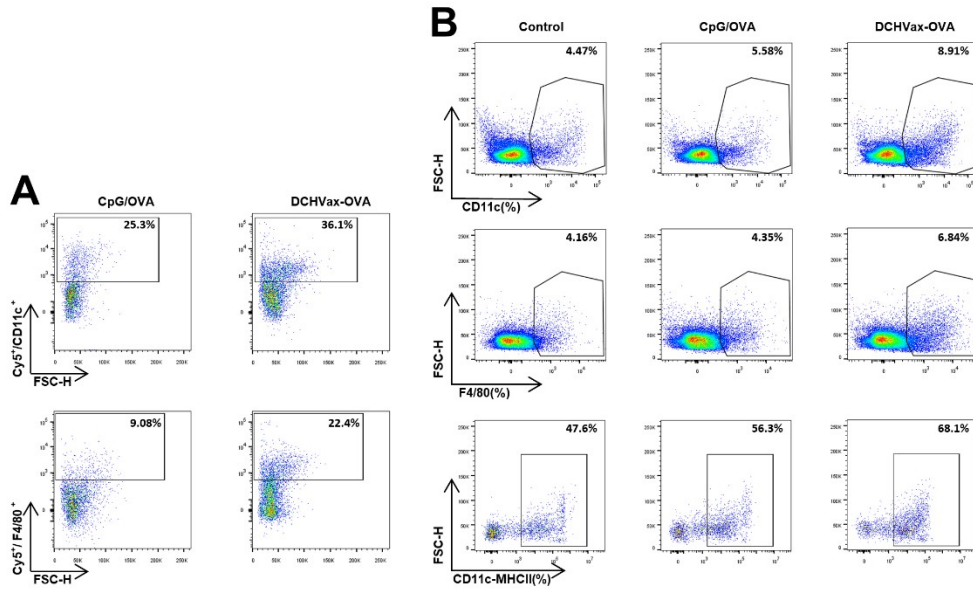

**Fig.S4.** A. Gating strategy and representative images of flow cytometry analysis on the Cy5<sup>+</sup>/CD11c<sup>+</sup>, Cy5<sup>+</sup>/F4/80<sup>+</sup> in the lymph nodes. B. Gating strategy and representative images of flow cytometry analysis on the CD11c<sup>+</sup>, F4/80<sup>+</sup>, and CD11c-MHCII<sup>+</sup> cells in the lymph nodes.

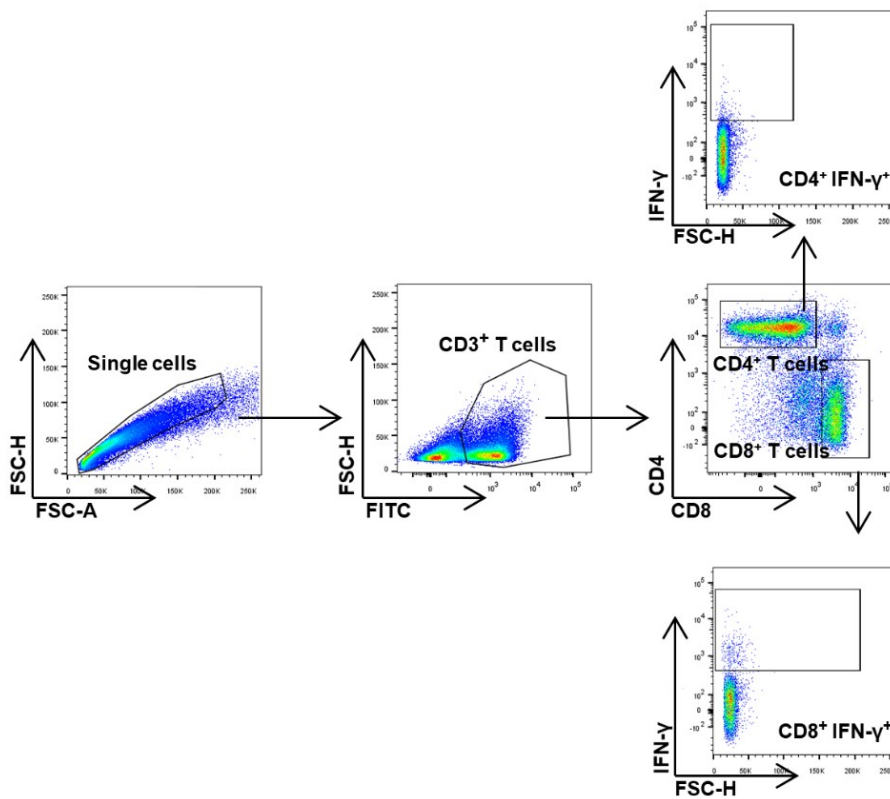

**Fig.S5.** Gating strategies for flow analysis of the blood samples in the B16-OVA tumor-bearing mice after various treatments.

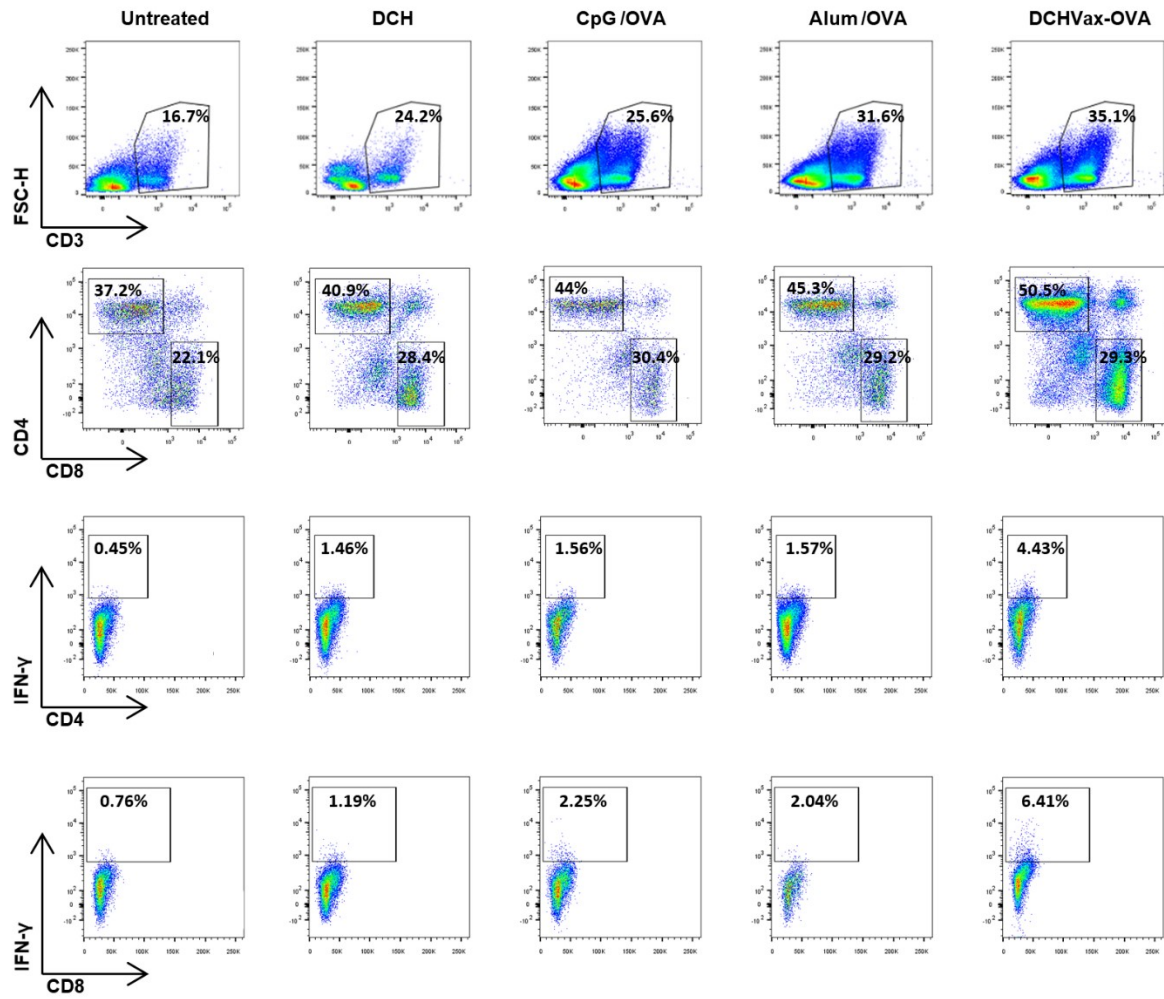

**Fig.S6.** Representative flow cytometry results of the CD4<sup>+</sup> T cells, CD8<sup>+</sup> T cells, IFN- $\gamma$ <sup>+</sup> CD4<sup>+</sup> T cells and IFN- $\gamma$ <sup>+</sup> CD8<sup>+</sup> T cells in the blood of B16-OVA tumor-bearing mice after various treatments.

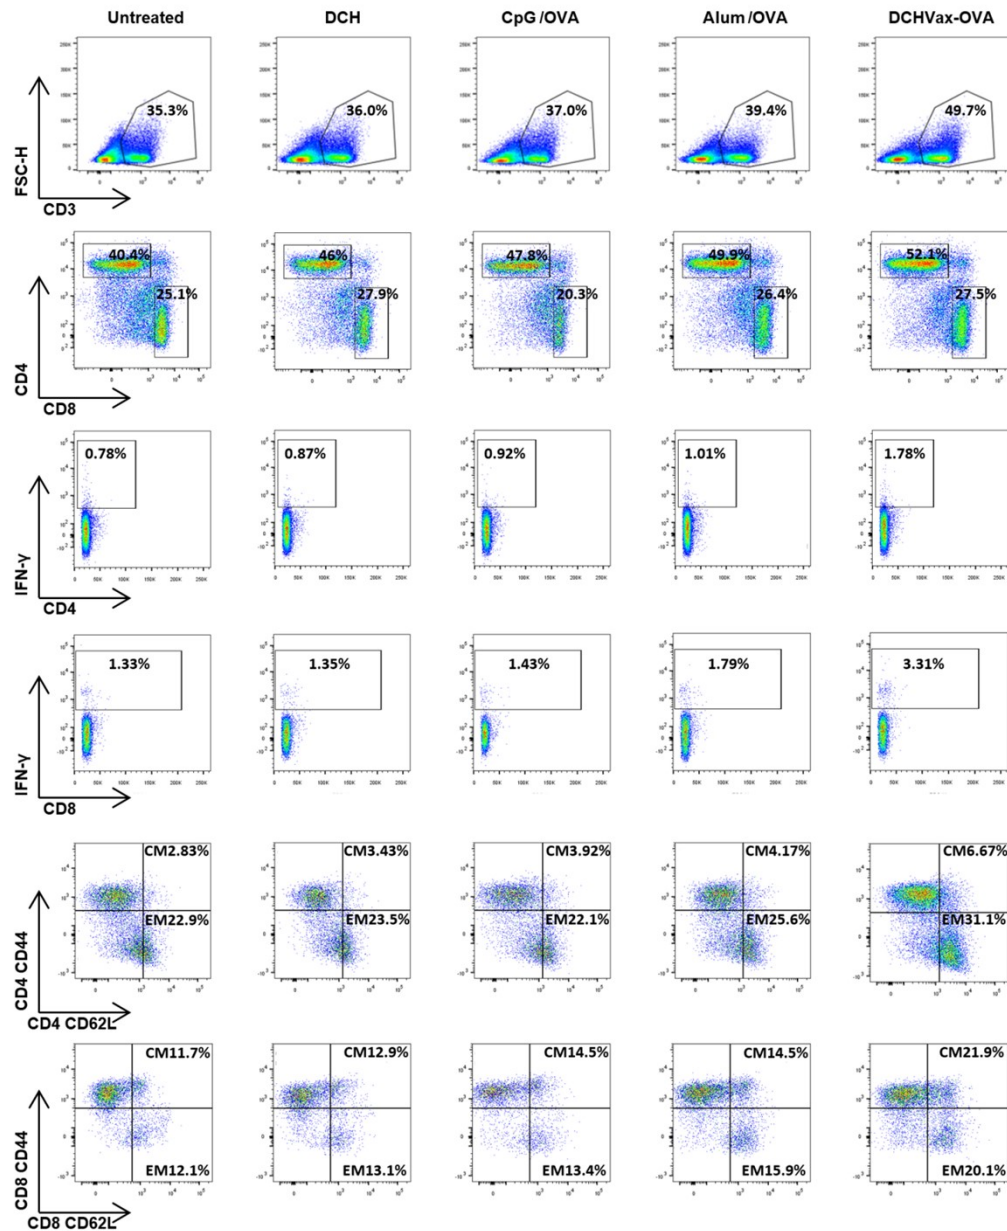

**Fig.S7.** Representative flow cytometry results of the CD4<sup>+</sup> T cells, CD8<sup>+</sup> T cells, IFN- $\gamma$ <sup>+</sup> CD4<sup>+</sup> T cells, IFN- $\gamma$ <sup>+</sup> CD8<sup>+</sup> T cells and memory T cells in the spleen of B16-OVA tumor-bearing mice after various treatments.

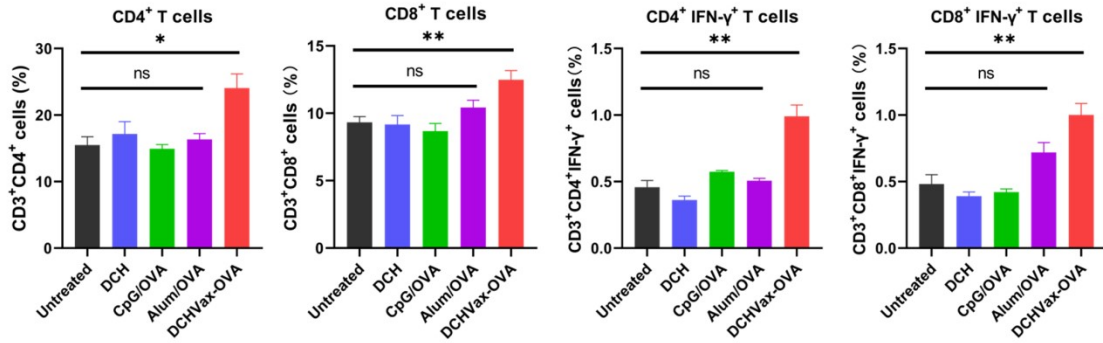

**Fig.S8.** Quantitative results of the CD4<sup>+</sup> T cells, CD8<sup>+</sup> T cells, IFN-γ<sup>+</sup> CD4<sup>+</sup> T cells, IFN-γ<sup>+</sup> CD8<sup>+</sup> T cells in the spleen of B16-OVA tumor-bearing mice after various treatments (*n* = 4).

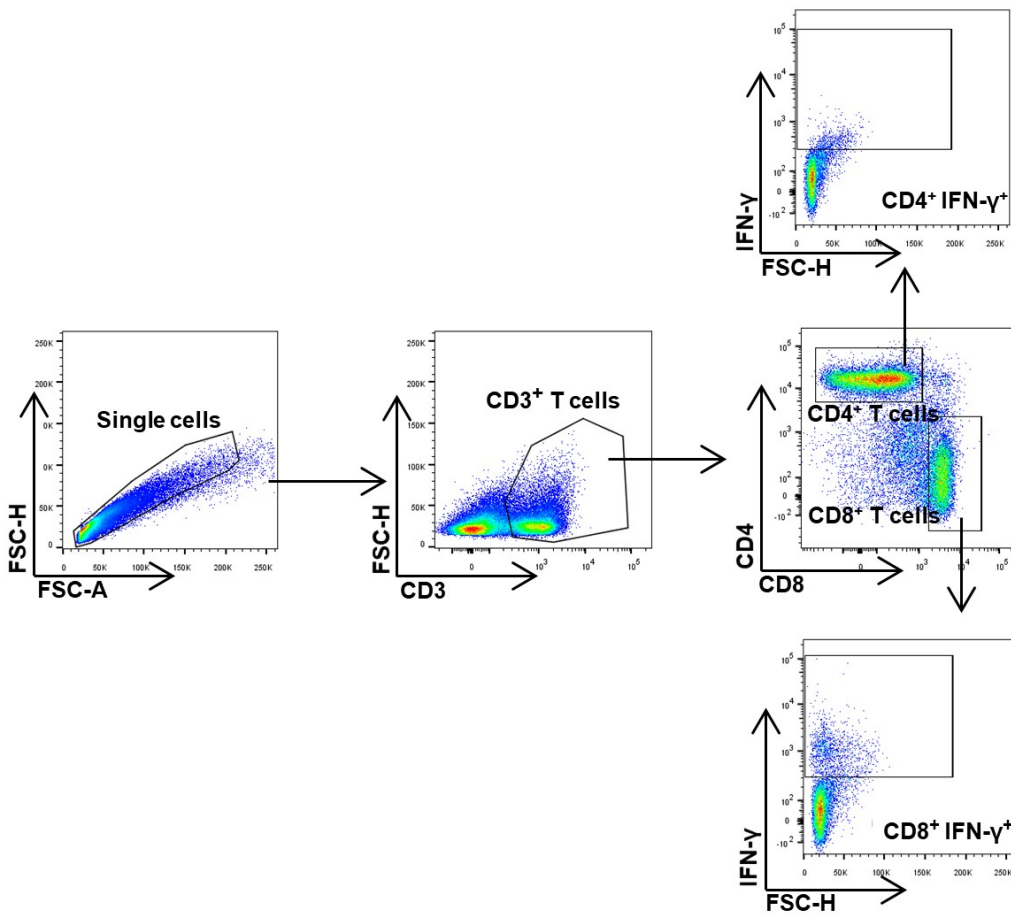

**Fig.S9.** Gating strategies for flow analysis of the blood samples in the MC38 tumor-bearing mice after various treatments.

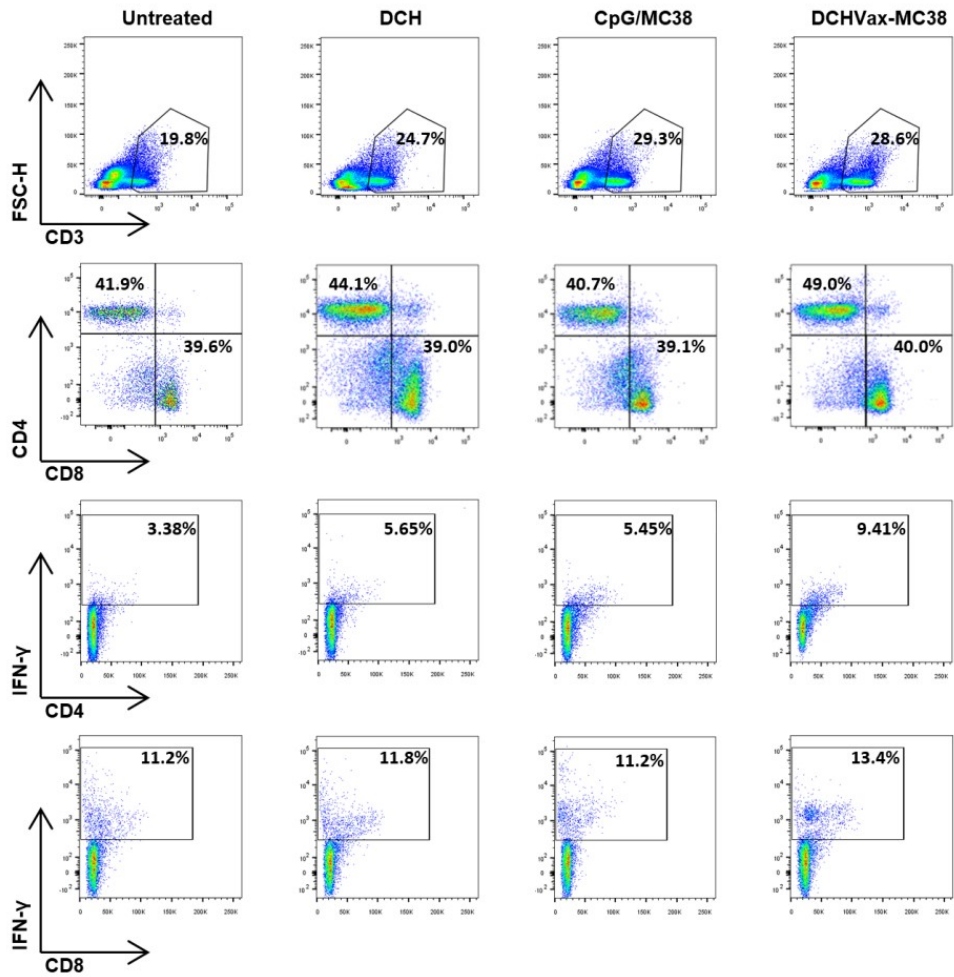

**Fig.S10.** Representative flow cytometry results of the CD4<sup>+</sup> T cells, CD8<sup>+</sup> T cells, IFN-γ<sup>+</sup> CD4<sup>+</sup> T cells and IFN-γ<sup>+</sup> CD8<sup>+</sup> T cells in the blood of MC38 tumor-bearing mice after various treatments.



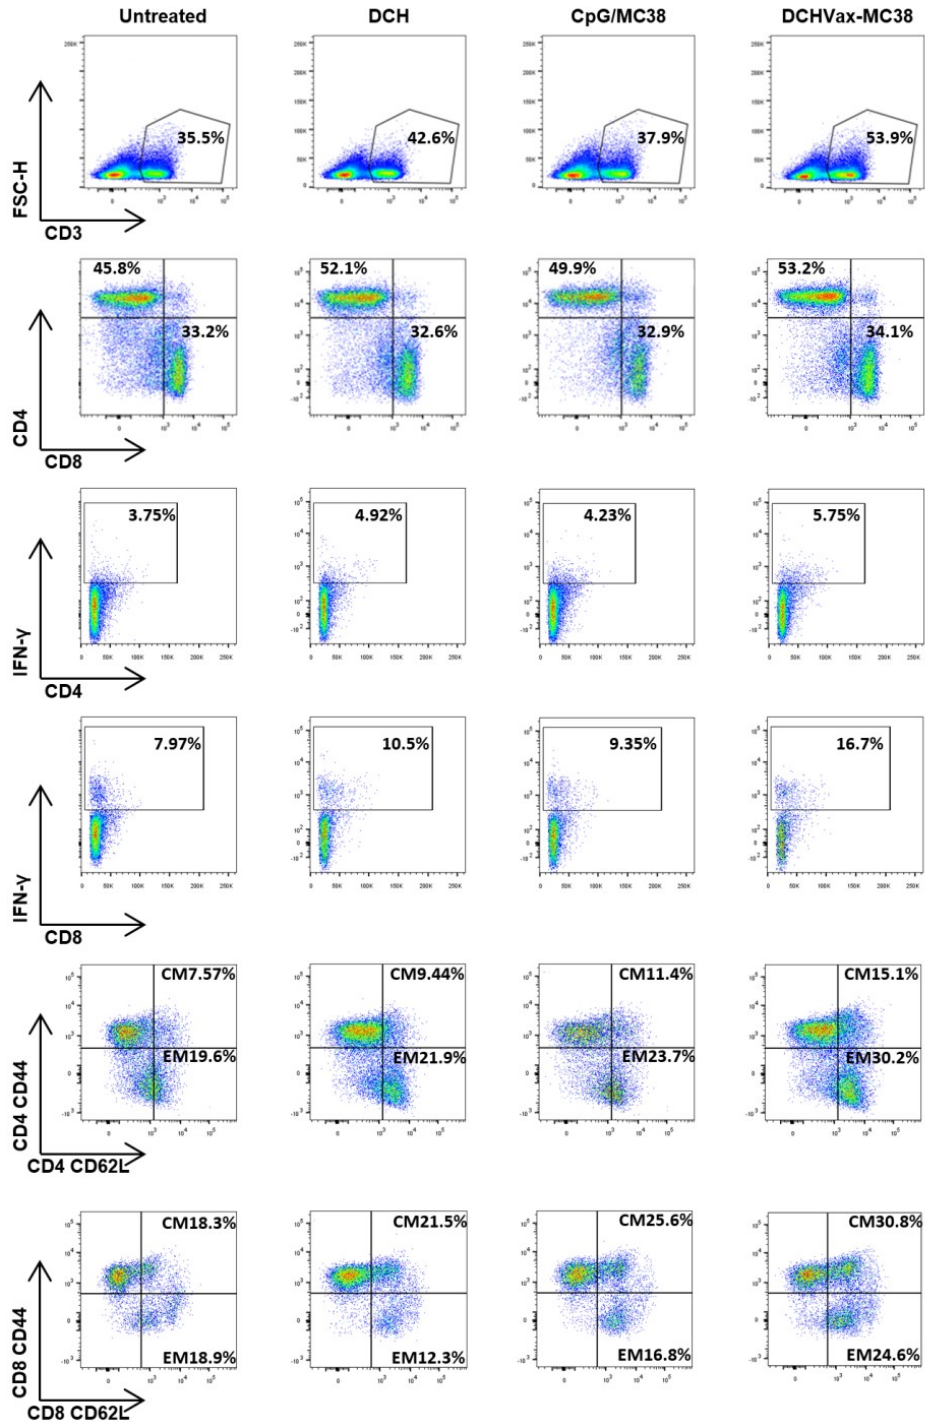

**Fig.S11.** Representative flow cytometry results of the CD4<sup>+</sup> T cell, CD8<sup>+</sup> T cell, IFN- $\gamma$ <sup>+</sup> CD4<sup>+</sup> T cell, IFN- $\gamma$ <sup>+</sup> CD8<sup>+</sup> T cell and memory T cell in spleen of MC38 tumor-bearing mice after various treatments.

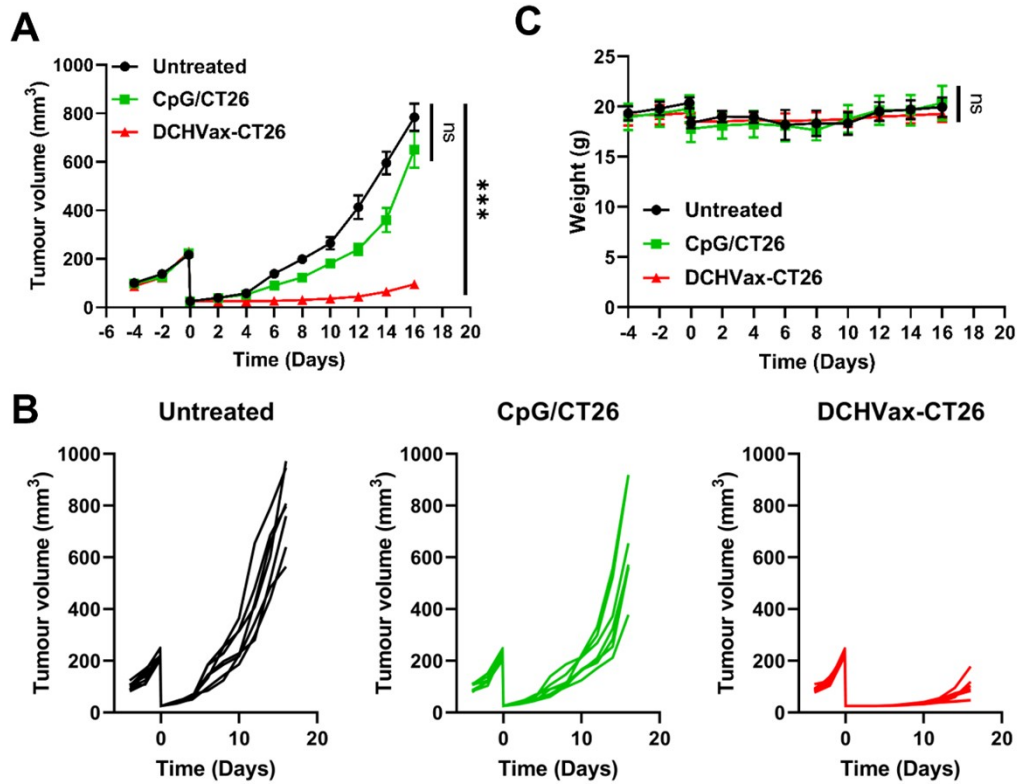

**Fig.S12.** DCHVax for CT26 tumor post-operative therapy ( $n = 7$ ). (A) The overall growth curve of CT26 tumors in different groups. (B) Individual tumor growth curves of CT26 tumors in different groups. (C) Body weight of CT26 tumor-bearing mice of different treatment groups. (ns, not significant; \*\*\* $p < 0.001$ ).

**Table S1. Antibodies used in this study.**

| <b>Antibodies</b>                       | <b>Company</b> | <b>Catalog</b> | <b>Application</b> |
|-----------------------------------------|----------------|----------------|--------------------|
| FITC anti-mouse CD3 Antibody            | BioLegend      | 100203         | flow               |
| PE/Cy7 anti-mouse CD4 Antibody          | BioLegend      | 100422         | flow               |
| Alexa Fluor700 anti-mouse CD8a Antibody | BioLegend      | 2075802        | flow               |
| IFN-gama-mouse BV650 Antibody           | BioLegend      | 505832         | flow               |
| PE anti-mouse CD44 Antibody             | BioLegend      | 103007         | flow               |
| Apc/Cy7 anti-mouse CD62L Antibody       | BioLegend      | 104418         | flow               |
| APC Anti- mouse CD11b Antibody          | BioLegend      | 101212         | Flow               |
| PE anti-mouse CD11c Antibody            | BioLegend      | 102026         | flow               |
| PE/Cy anti-mouse F4/80 Antibody         | BioLegend      | 123114         | flow               |
| PE Anti- mouse Gr-1 Antibody            | BioLegend      | 108408         | Flow               |
| APC-Cy7 Anti- mouse MHCII Antibody      | BioLegend      | 116630         | Flow               |
| PE Anti- mouse CD19 Antibody            | BioLegend      | 115507         | Flow               |
